# Supplementary material for: Enhanced catalytic activity of α-Fe2O3 nanorods enclosed with {110} and {001} planes for methane combustion and CO oxidation
Source: Royal Society of Chemistry journal article supplement (doi:10.1039/c1cy00080b), 2011-01-01
Supplement: c1cy00080b.pdf [file c1cy00080b.pdf]

Supplementary Information

## Enhanced catalytic activity of $\alpha$ -Fe<sub>2</sub>O<sub>3</sub> nanorods enclosed with {110} and {001} planes for methane combustion and CO oxidation

Qi-Xiu Gao, Xiao-Fang Wang, Jie-Ling Di, Xing-Cai Wu\*, and You-Rong Tao\*

Key Laboratory of Mesoscopic Chemistry of MOE, and School of Chemistry and Chemical Engineering, Nanjing University, Nanjing 210093, P. R. China

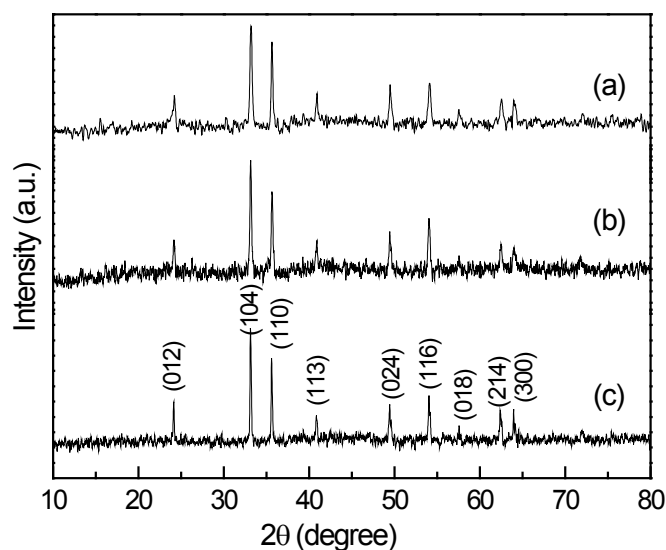

**Fig. S1.** XRD patterns of the  $\alpha$ -Fe<sub>2</sub>O<sub>3</sub> nanocrystals with different morphologies. (a) nanorods, (b) nanotubes, and (c) nanocubes.

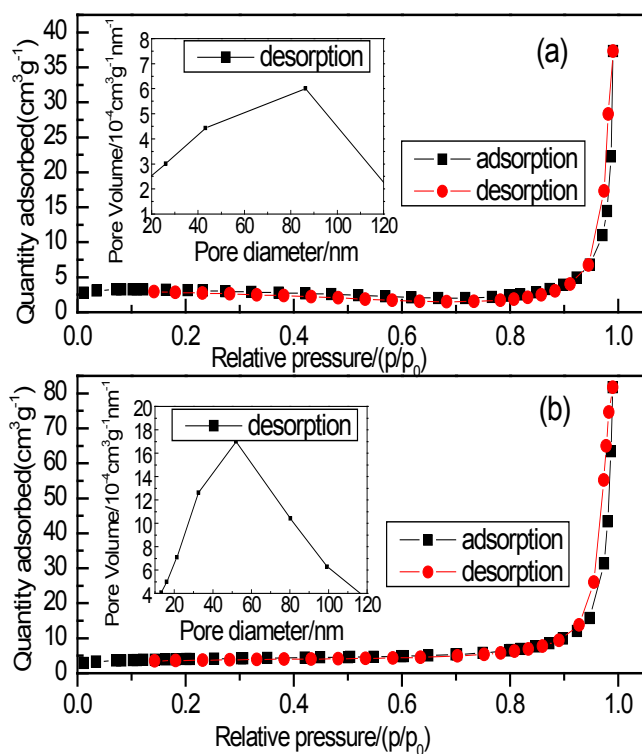

**Fig. S2.** N<sub>2</sub> adsorption-desorption isotherms curves for  $\alpha$ -Fe<sub>2</sub>O<sub>3</sub> nanorods (a) and nanotubes (b). Insets are corresponding pore size distribution.
